# Supplementary material
Source: PubMed Central journal article supplement (PMC6431264)
Supplement: NIHMS1510796-supplement-1.pdf [file NIHMS1510796-supplement-1.pdf]

**Supplemental Materials**

**Supplemental Table 1.** Baseline characteristics for providers of HCC patients

(n=13,714)

| Variable                  | Consistent screening* (%) | Inconsistent screening** (%) | No screening (%) | P-value |
|---------------------------|---------------------------|------------------------------|------------------|---------|
| Provider specialty        |                           |                              |                  | <.001   |
| Gastroenterology          | 840 (89.7)                | 3,895 (67.5)                 | 2,295 (32.7)     |         |
| Internal medicine         | 97 (10.4)                 | 1,792 (31.1)                 | 4,075 (58.1)     |         |
| Other ‡                   | 0 (0)                     | 81 (1.4)                     | 639 (9.1)        |         |
| Practice setting          |                           |                              |                  | <.001   |
| Solo practice             | 347 (37.0)                | 2,076 (36.0)                 | 2,284 (32.6)     |         |
| Group practice            | 400 (42.7)                | 2,720 (47.2)                 | 3,468 (49.5)     |         |
| Hospital-based            | 76 (8.1)                  | 394 (6.8)                    | 530 (7.6)        |         |
| University-based          | 17 (1.8)                  | 52 (.9)                      | 58 (.8)          |         |
| Other                     | 97 (10.4)                 | 526 (9.1)                    | 669 (9.5)        |         |
| Medical school graduation |                           |                              |                  | .058    |
| Prior to 1968             | 84 (9.0)                  | 534 (9.3)                    | 727 (10.4)       |         |
| 1969-1984                 | 414 (44.2)                | 2,654 (46.0)                 | 3,276 (46.7)     |         |
| 1985-2000                 | 405 (43.2)                | 2,416 (41.9)                 | 2,794 (39.9)     |         |
| After 2001                | 34 (3.6)                  | 164 (2.8)                    | 212 (3.0)        |         |
| Training location         |                           |                              |                  | <.001   |
| Within U.S.               | 601 (64.1)                | 3,750 (65.0)                 | 4,923 (70.2)     |         |
| Outside U.S.              | 319 (34.0)                | 1,894 (32.8)                 | 1,927 (27.5)     |         |
| Unknown                   | 17 (1.8)                  | 124 (2.2)                    | 159 (2.3)        |         |

\*Receipt of ≥1 abdominal ultrasound per calendar year

\*\*Receipt of ≥1 abdominal ultrasound during study period but less than annually

‡ Providers other than gastroenterologist or primary care provider

**Supplemental Table 2.** Correlates of consistent and inconsistent HCC screening receipt  
(n=13,714)

| Variable               | Consistent Screening* |             |         | Inconsistent Screening** |           |         |
|------------------------|-----------------------|-------------|---------|--------------------------|-----------|---------|
|                        | Adjusted OR           | 95% CI      | P-value | Adjusted OR              | 95% CI    | P-value |
| Age at HCC diagnosis   | 1.00                  | 1.00-1.01   | .07     | 1.00                     | .99-1.00  | .07     |
| Sex                    |                       |             |         |                          |           |         |
| Male                   | Ref                   | Ref         | Ref     | Ref                      | Ref       | Ref     |
| Female                 | 1.29                  | 1.09-1.53   | .003    | 1.21                     | 1.11-1.32 | <.001   |
| Race/ethnicity         |                       |             |         |                          |           |         |
| Non-Hispanic White     | Ref                   | Ref         | Ref     | Ref                      | Ref       | Ref     |
| Black                  | .98                   | .74-1.29    | .87     | 1.01                     | .88-1.16  | .87     |
| Hispanic               | 1.51                  | 1.20-1.89   | <.001   | 1.24                     | 1.09-1.41 | .001    |
| Asian                  | 3.24                  | 2.52-4.16   | <.001   | 1.33                     | 1.15-1.55 | <.001   |
| Other                  | 2.11                  | 1.54-2.91   | <.001   | 1.12                     | .93-1.34  | .23     |
| Year of HCC diagnosis  |                       |             |         |                          |           |         |
| 2003                   | Ref                   | Ref         | Ref     | Ref                      | Ref       | Ref     |
| 2004                   | .91                   | .57-1.47    | .71     | .98                      | .78-1.22  | .83     |
| 2005                   | .70                   | .44-1.13    | .15     | 1.04                     | .84-1.29  | .72     |
| 2006                   | .65                   | .41-1.02    | .06     | .86                      | .69-1.06  | .16     |
| 2007                   | .77                   | .50-1.19    | .25     | .89                      | .72-1.10  | .27     |
| 2008                   | .54                   | .35-.85     | .007    | .81                      | .66-.99   | .04     |
| 2009                   | .43                   | .28-.67     | <.001   | .74                      | .60-.90   | .003    |
| 2010                   | .82                   | .54-1.24    | .34     | .78                      | .64-.96   | .02     |
| 2011                   | .64                   | .42-.97     | .04     | .74                      | .60-.90   | .003    |
| 2012                   | .72                   | .48-1.10    | .13     | .79                      | .65-.97   | .02     |
| 2013                   | .94                   | .563-1.41   | .77     | .67                      | .55-.82   | <.001   |
| Cirrhosis duration     |                       |             |         |                          |           |         |
| No prior diagnosis     | Ref                   | Ref         | Ref     | Ref                      | Ref       | Ref     |
| <3 years prior to HCC  | 3.31                  | 2.53-4.34   | <.001   | 2.12                     | 1.88-2.40 | <.001   |
| >3 years prior to HCC  | 3.13                  | 2.38-4.12   | <.001   | 1.14                     | .99-1.31  | .07     |
| Liver disease etiology |                       |             |         |                          |           |         |
| No known liver disease | Ref                   | Ref         | Ref     | Ref                      | Ref       | Ref     |
| Hepatitis B            | 12.36                 | 7.26-20.7   | <.001   | 2.47                     | 1.90-3.22 | <.001   |
| Hepatitis C            | 7.43                  | 5.07-10.91  | <.001   | 1.91                     | 1.68-2.16 | <.001   |
| Alcohol-related        | 2.40                  | 1.35-4.27   | .003    | 1.35                     | 1.08-1.68 | .008    |
| Other liver disease    | 6.66                  | 4.37-10.16  | <.001   | 2.18                     | 1.88-2.54 | <.001   |
| >1 liver disease       | 18.98                 | 13.11-27.50 | <.001   | 3.62                     | 3.14-4.16 | <.001   |
| Presence of ascites    | 1.63                  | 1.29-2.05   | <.001   | 1.67                     | 1.43-1.96 | <.001   |
| Hepatic encephalopathy | 1.70                  | 1.35-2.15   | <.001   | 1.20                     | 1.01-1.43 | .04     |
| NCI comorbidity index  |                       |             |         |                          |           |         |
| None                   | Ref                   | Ref         | Ref     | Ref                      | Ref       | Ref     |
| Low (1-2)              | 1.96                  | .19-1.21    | .16     | 1.22                     | 1.01-1.48 | .04     |

|                    |         |          |       |      |           |       |
|--------------------|---------|----------|-------|------|-----------|-------|
| Moderate (3-4)     | 2.21    | .19-1.17 | .10   | 1.45 | 1.20-1.76 | <.001 |
| High (5+)          | 3.72    | .14-.87  | .005  | 1.99 | 1.65-2.41 | <.001 |
| Provider specialty |         |          |       |      |           |       |
| Other ‡            | Ref     | Ref      | Ref   | Ref  | Ref       | Ref   |
| Gastroenterology   | >999.99 | >999.99  | <.001 | 6.47 | 5.04-8.30 | <.001 |
| Internal medicine  | >999.99 | >999.99  | <.001 | 2.89 | 2.25-3.70 | <.001 |
| Practice setting   |         |          |       |      |           |       |
| Solo practice      | Ref     | Ref      | Ref   | Ref  | Ref       | Ref   |
| Group practice     | .89     | .74-1.06 | .19   | .94  | .86-1.03  | .19   |
| Hospital-based     | .94     | .69-1.27 | .67   | .81  | .69-96    | .02   |
| University-based   | 1.40    | .72-2.72 | .32   | .79  | .51-1.24  | .31   |
| Other              | .99     | .75-1.31 | .93   | .91  | .78-1.05  | .20   |
| Training location  |         |          |       |      |           |       |
| Outside U.S.       | Ref     | Ref      | Ref   | Ref  | Ref       | Ref   |
| Within U.S.        | .95     | .80-1.13 | .59   | .91  | .83-.99   | .03   |
| Unknown            | 1.12    | .63-2.02 | .70   | 1.01 | .76-1.33  | .96   |

\*Receipt of ≥1 abdominal ultrasound per calendar year

\*\*Receipt of ≥1 abdominal ultrasound during study period but less than annually

†Reference screening category were HCC patients who did not receive screening

‡ Providers other than gastroenterologist or primary care provider

### **Lead and Length Time Bias Sensitivity Analysis**

Following the parametric model by Duffy and colleagues, correction for lead time bias involves estimation of the additional follow-up time due to lead time in the case of screen-detected cancer.<sup>28</sup> The expected additional follow-up time,  $s$ , is  $E(s) =$

$\frac{1-e^{-\lambda t}-\lambda t e^{-\lambda t}}{\lambda(1-e^{-\lambda t})}$  for a patient with screen-detected cancer known to be dead at time  $t$  after

diagnosis and  $E(s) = \frac{1-e^{-\lambda t}}{\lambda}$  for a patient with screen-detected cancer known to be alive

at time  $t$  after diagnosis. To correct for lead time bias,  $E(s)$  was subtracted from

observed survival time of screen-detected patients, which were defined as those who received screening ultrasound within 6 months prior to HCC diagnosis.<sup>28</sup>

After the lead-time was adjusted among screen-detected patients, we further adjusted for length time bias following the method proposed by Duffy and colleagues.

The relative risk of death from screen-detected versus symptomatic tumors,  $\varphi$ , was estimated by the observed probability of death from screen-detected,  $p_1$ , and symptomatic tumors,  $p_2$ , and the observed probability of screen-detected tumors,  $p_3$ , by giving plausible values for a proportion of patients with slow-growing tumors,  $1 - q$ , and the relative risk of death from slow-growing tumors versus aggressive tumors,  $\theta$ , that is:

$\hat{\varphi} = \frac{p_2\{(\theta q + 1 - q)(\theta + q(1 - \theta)) - p_3\theta\}}{p_1\theta(1 - p_3)}$ . By multiplying  $\hat{\varphi}$  and the survival rate for patients with

symptomatic tumors, in this section, we estimate the survival rate for screen-detected tumors correcting for length time bias under various plausible data inputs.<sup>28</sup>

**Supplemental Table 3.** Kaplan-Meier survival estimates by receipt of HCC screening for all patients, unadjusted and adjusted for lead and length time biases (n=13,714)

| Screening group                                 | Median survival, months (95% CI) | 1-year survival(%) (95% CI)† | 3-year survival(%) (95% CI)† | 5-year survival(%) (95% CI)† | log-rank test |
|-------------------------------------------------|----------------------------------|------------------------------|------------------------------|------------------------------|---------------|
| <b>Unadjusted</b>                               |                                  |                              |                              |                              |               |
| Consistent screening*                           | 17.00 (15.00-19.00)              | 58 (55-61)                   | 25 (22-28)                   | 15 (12-18)                   | <.001         |
| Inconsistent screening**                        | 10.00 (10.00-11.00)              | 45 (44-46)                   | 20 (19-21)                   | 10 (9-11)                    |               |
| No screening                                    | 5.00 (5.00-6.00)                 | 34 (33-35)                   | 13 (12-14)                   | 6 (6-7)                      |               |
| <b>Adjusted for lead time bias</b>              |                                  |                              |                              |                              |               |
| Mean sojourn time = 3 months                    |                                  |                              |                              |                              |               |
| Consistent screening*                           | 16.00 (13.09-18.00)              | 56 (53-59)                   | 24 (22-27)                   | 14 (12-17)                   | <.001         |
| Inconsistent screening**                        | 10.00 (9.00-10.00)               | 45 (43-46)                   | 19 (18-21)                   | 10 (9-11)                    |               |
| Mean sojourn time = 6 months                    |                                  |                              |                              |                              |               |
| Consistent screening*                           | 14.05 (13.00-16.72)              | 54 (51-57)                   | 24 (21-27)                   | 13 (11-16)                   | <.001         |
| Inconsistent screening**                        | 9.94 (9.00-10.00)                | 44 (43-45)                   | 19 (18-20)                   | 10 (9-11)                    |               |
| Mean sojourn time = 9 months                    |                                  |                              |                              |                              |               |
| Consistent screening*                           | 14.00 (12.65-16.00)              | 54 (51-57)                   | 22 (19-25)                   | 13 (11-16)                   | <.001         |
| Inconsistent screening**                        | 9.86 (9.00-10.00)                | 44 (43-45)                   | 19 (18-20)                   | 10 (9-11)                    |               |
| <b>Adjusted for lead and length time biases</b> |                                  |                              |                              |                              |               |
| Mean sojourn time = 3 months                    |                                  |                              |                              |                              |               |
| Consistent screening*                           |                                  | 55 (53-58)                   | 24 (22-26)                   | 14 (13-16)                   |               |
| Inconsistent screening**                        |                                  | 44 (44-45)                   | 19 (19-20)                   | 10 (10-10)                   |               |
| Mean sojourn time = 6 months                    |                                  |                              |                              |                              |               |
| Consistent screening*                           |                                  | 54 (52-56)                   | 23 (21-25)                   | 13 (11-15)                   |               |
| Inconsistent screening**                        |                                  | 44 (44-45)                   | 19 (19-20)                   | 10 (10-10)                   |               |
| Mean sojourn time = 9 months                    |                                  |                              |                              |                              |               |
| Consistent screening*                           |                                  | 54 (52-56)                   | 22 (20-24)                   | 13 (11-15)                   |               |
| Inconsistent screening**                        |                                  | 44 (44-44)                   | 19 (19-19)                   | 10 (10-10)                   |               |

\*Receipt of  $\geq 1$  abdominal ultrasound per calendar year

\*\*Receipt of  $\geq 1$  abdominal ultrasound during study period but less than annually

†For lead and length time bias adjustment, weighted average of screen-detected and symptomatic cancer was calculated with the results of Supplemental Table 4, that is, we assumed  $1 - q = 20\%$  and  $\theta = 0.9$

**Supplemental Table 4.** Survival estimates by receipt of HCC screening for patients with screen-detected and symptomatic tumors, unadjusted (n=13,714) and adjusted for lead and length time biases for only the screen-detected patients (n=1,136)

| Screening group                                 |                          | N (%)        | 1-year survival(%) (95% CI)† | 3-year survival(%) (95% CI)† | 5-year survival(%) (95% CI)† |
|-------------------------------------------------|--------------------------|--------------|------------------------------|------------------------------|------------------------------|
| <b>Unadjusted for lead time bias</b>            |                          |              |                              |                              |                              |
| Consistent screening*                           | Screen-detected          | 390 (2.8)    | 63 (58-68)                   | 31 (26-36)                   | 19 (15-24)                   |
|                                                 | Symptomatic              | 547 (4.0)    | 54 (50-59)                   | 21 (17-25)                   | 12 (9-15)                    |
| Inconsistent screening**                        | Screen-detected          | 746 (5.4)    | 59 (55-62)                   | 29 (26-33)                   | 17 (14-20)                   |
|                                                 | Symptomatic              | 5,022 (36.6) | 43 (42-44)                   | 18 (17-20)                   | 9 (8-10)                     |
| No screening                                    | Symptomatic              | 7,009 (51.1) | 34 (33-35)                   | 13 (12-14)                   | 6 (6-7)                      |
| <b>Adjusted for lead time bias</b>              |                          |              |                              |                              |                              |
| Mean sojourn time = 3 months                    |                          |              |                              |                              |                              |
| Consistent screening*                           | Screen-detected          | 390 (2.8)    | 57 (52-62)                   | 29 (24-34)                   | 18 (14-22)                   |
|                                                 | Inconsistent screening** | 746 (5.4)    | 54 (50-57)                   | 26 (23-30)                   | 16 (13-19)                   |
| Mean sojourn time = 6 months                    |                          |              |                              |                              |                              |
| Consistent screening*                           | Screen-detected          | 390 (2.8)    | 54 (49-59)                   | 26 (21-31)                   | 15 (11-20)                   |
|                                                 | Inconsistent screening** | 746 (5.4)    | 51 (47-55)                   | 24 (21-27)                   | 15 (13-18)                   |
| Mean sojourn time = 9 months                    |                          |              |                              |                              |                              |
| Consistent screening*                           | Screen-detected          | 390 (2.8)    | 54 (48-58)                   | 24 (19-29)                   | 15 (11-19)                   |
|                                                 | Inconsistent screening** | 746 (5.4)    | 51 (47-54)                   | 23 (20-26)                   | 14 (12-17)                   |
| <b>Adjusted for lead and length time biases</b> |                          |              |                              |                              |                              |
| Mean sojourn time = 3 months                    |                          |              |                              |                              |                              |
| Consistent screening*                           | Screen-detected          | 390 (2.8)    | 57 (56-57)                   | 28 (28-29)                   | 17 (16-18)                   |
|                                                 | Inconsistent screening** | 746 (5.4)    | 53 (53-53)                   | 26 (25-26)                   | 16 (15-16)                   |
| Mean sojourn time = 6 months                    |                          |              |                              |                              |                              |
| Consistent screening*                           | Screen-detected          | 390 (2.8)    | 54 (53-54)                   | 25 (25-26)                   | 15 (14-15)                   |
|                                                 | Inconsistent screening** | 746 (5.4)    | 51 (50-51)                   | 24 (23-24)                   | 15 (14-15)                   |
| Mean sojourn time = 9 months                    |                          |              |                              |                              |                              |
| Consistent                                      | Screen-                  | 390          | 54 (53-54)                   | 23 (22-23)                   | 14 (13-15)                   |

|                          |                 |           |            |            |            |
|--------------------------|-----------------|-----------|------------|------------|------------|
| screening*               | detected        | (2.8)     |            |            |            |
| Inconsistent screening** | Screen-detected | 746 (5.4) | 50 (50-50) | 22 (22-23) | 13 (13-14) |

\*Receipt of  $\geq 1$  abdominal ultrasound per calendar year

\*\*Receipt of  $\geq 1$  abdominal ultrasound during study period but less than annually

†For length time bias adjustment, the survival rates are estimated by  $1 - q = 20\%$  and  $\theta = 0.9$
